# Supplementary material for: Health care seeking behaviour for children with acute childhood illnesses and its relating factors in sub-Saharan Africa: evidence from 24 countries
Source: PubMed Central journal article supplement (PMC8670049; doi:10.1186/s41182-021-00385-1), 2021-12-14
Supplement: 41182_2021_385_MOESM1_ESM.pdf [file 41182_2021_385_MOESM1_ESM.pdf]

| <b>Country</b>               | <b>Survey year</b> | <b>N</b>     | <b>Seek medical treatment (%)</b> |
|------------------------------|--------------------|--------------|-----------------------------------|
| Angola                       | 2015-16            | 3747         | 43.6                              |
| Benin                        | 2017-18            | 3979         | 25.4                              |
| Burundi                      | 2016-17            | 7976         | 53.4                              |
| Cameroon                     | 2018               | 3065         | 22.1                              |
| Chad                         | 2014-15            | 6679         | 24.2                              |
| Democratic Republic of Congo | 2013-14            | 8390         | 36.9                              |
| Ethiopia                     | 2016               | 3057         | 28.8                              |
| Gambia                       | 2013               | 2199         | 62.7                              |
| Ghana                        | 2014               | 1521         | 56.6                              |
| Guinea                       | 2018               | 2212         | 41.6                              |
| Lesotho                      | 2014               | 1083         | 51.9                              |
| Liberia                      | 2013               | 2795         | 51.6                              |
| Malawi                       | 2015-16            | 8116         | 56.3                              |
| Mali                         | 2013               | 2890         | 27.2                              |
| Namibia                      | 2013               | 1965         | 55.9                              |
| Nigeria                      | 2018               | 10823        | 61.8                              |
| Rwanda                       | 2014-15            | 2831         | 45.4                              |
| Sierra Leone                 | 2013               | 3738         | 65.1                              |
| South Africa                 | 2016               | 1197         | 44.5                              |
| Tanzania                     | 2015-16            | 2949         | 28.7                              |
| Togo                         | 2013-14            | 2599         | 32.4                              |
| Uganda                       | 2016               | 8485         | 54.1                              |
| Zambia                       | 2013-14            | 3289         | 54.0                              |
| Zimbabwe                     | 2015               | 3005         | 28.3                              |
| <b>Total</b>                 |                    | <b>98590</b> |                                   |
